# Supplementary material
Source: PubMed Central journal article supplement (PMC7665225)
Supplement: NIHMS1638081-supplement-Segmental_Material_bleeding_with_Warfarin_and_NSAIDs.pdf [file NIHMS1638081-supplement-Segmental_Material_bleeding_with_Warfarin_and_NSAIDs.pdf]

**A: Gastrointestinal bleeding: warfarin – NSAID.**

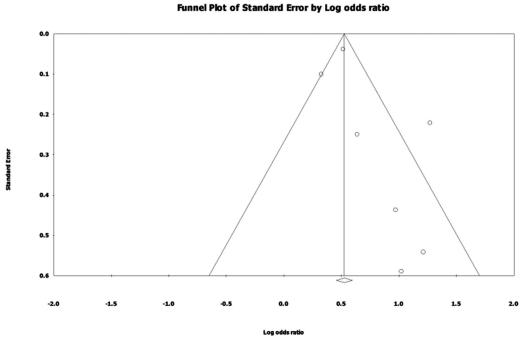

Egger's test:  $p$ -value = 0.1789

**C: Gastrointestinal bleeding: warfarin – COX2.**

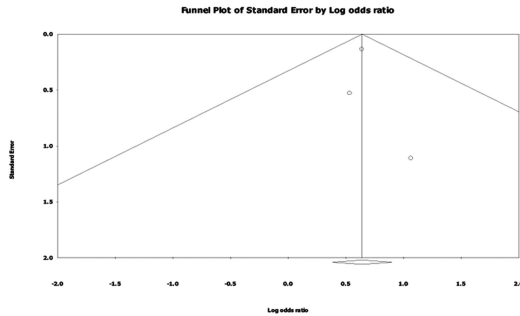

Egger's test:  $p$ -value = 0.9678

**B: General bleeding: warfarin – NSAID.**

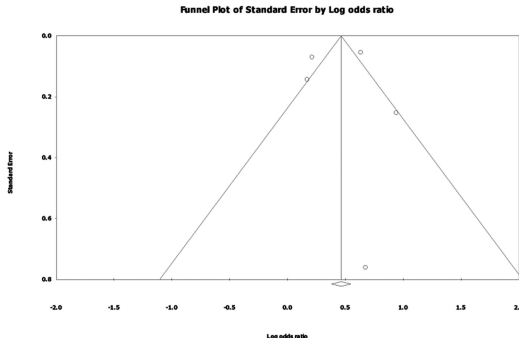

Egger's test:  $p$ -value = 0.7406.

**D: General bleeding: warfarin – COX2.**

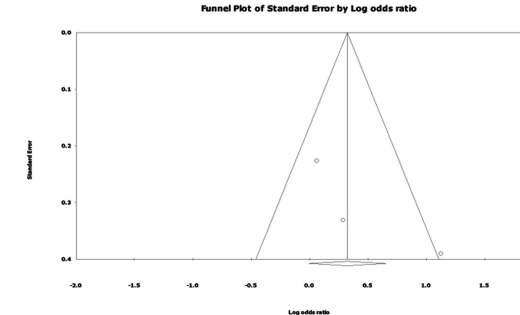

Egger's test:  $p$ -value = 0.3013.

Supplementary Appendix S1 Sensitivity analysis showing the influence of each study on the pooled estimate, one-study removed approach.

**A**: Gastrointestinal bleeding: warfarin – NSAID.

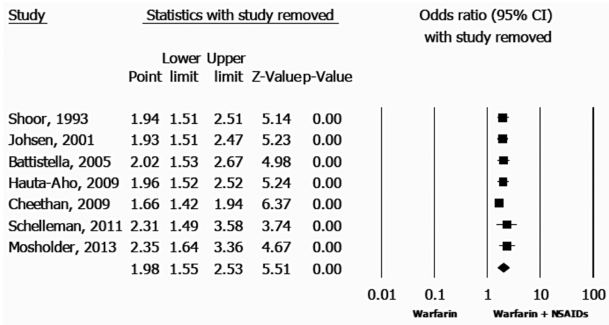

**C**: General bleeding: warfarin – NSAID.

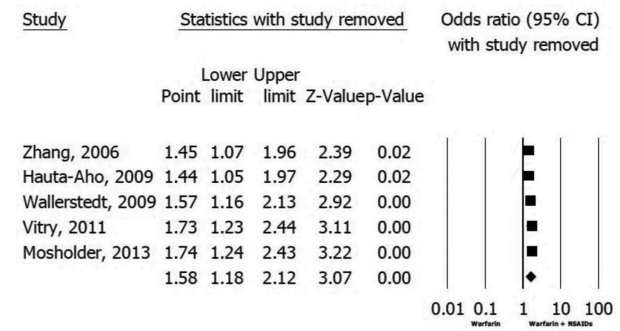

**B**: Gastrointestinal bleeding: warfarin – COX2.

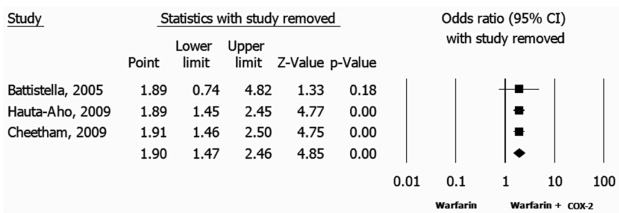

**D**: General bleeding: warfarin – COX2.

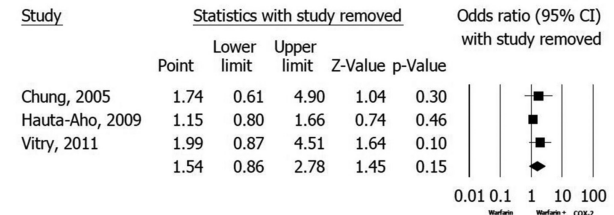

Supplementary Appendix S2 Funnel plots for meta-analysis of studied outcomes.

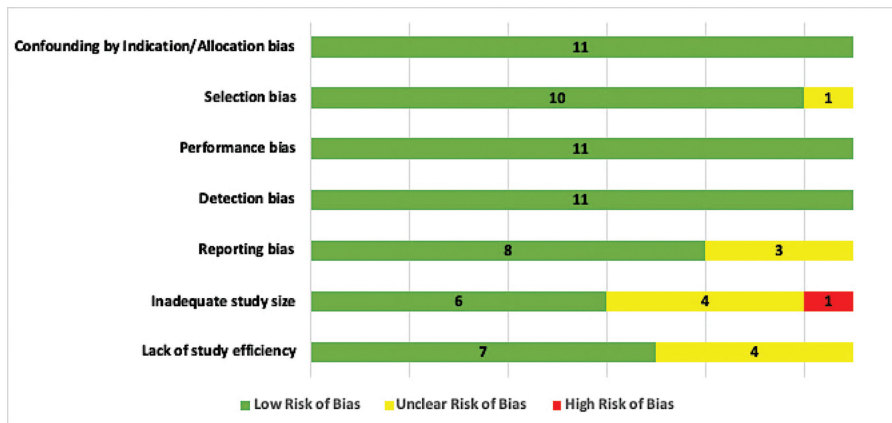

Supplementary Appendix S3 Assessment of risk of bias of included studies.
